# Supplementary material
Source: HighWire-hosted journal article supplement (https://bmjopen.bmj.com/content/14/10/e085233)

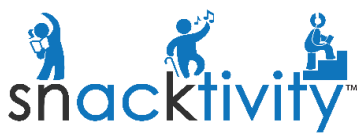

Appendix.2

Snacktivity™ intervention fidelity checklist for health care professionals

DON'T FORGET TO TURN ON YOUR DICTAPHONE (with patient consent)

Participant trial number:                      Recording number:                     

Date:    /    /   

Is the consultation being held: Online/via telephone    or face to face   

| Checklist item                                                                                                                                                                                                                      | Yes |
|-------------------------------------------------------------------------------------------------------------------------------------------------------------------------------------------------------------------------------------|-----|
| Mention the importance of physical activity for both physical and mental health. Mention the importance of physical activity to keep our muscles strong.                                                                            |     |
| Introduce the idea and concept of Snacktivity. Explain the specific advantages of Snacktivity.                                                                                                                                      |     |
| Emphasise the goal for participants is to work towards achieving 30 minutes of Moderate-to-Vigorous Physical Activity (MVPA) per day. This means they should raise their heart rate, for example as if they were rushing for a bus. |     |
| Suggest strategies that might help people to increase their Snacktivity/physical activity. For example, planning when they might do Snacktivity or doing their Snacktivity with somebody else                                       |     |
| Mention how Snacktivity can help to reduce sitting time during the day.                                                                                                                                                             |     |
| Outline the purpose and importance of using the physical activity tracker (to be provided by the research team after this appointment).                                                                                             |     |
| Outline the purpose and importance of using the physical activity SnackApp (access to this app is provided after this consultation).                                                                                                |     |
| Mention the importance of trying to stick to Snacktivity/physical activity over time and using strategies to help them do this; the SnackApp will have lots of ideas.                                                               |     |
| Mention the importance of action planning (really encourage the patient to think about where and when they will do their Snacktivity/physical activity).                                                                            |     |
| Check the participant has set an initial goal and highlight how the SnackApp can help them do this (point them towards the schedule feature on the SnackApp).                                                                       |     |
| Check the patient understands what the Snacktivity™ intervention involves.                                                                                                                                                          |     |
| Check the participant knows where to find any further information if they have any questions/problems.                                                                                                                              |     |

Name of healthcare professional:                     

Occupation/role:                     

Signature:                     

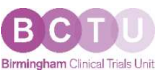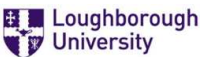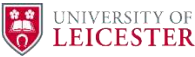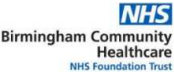

Supplement: inline-supplementary-material-2 [file inline-supplementary-material-2.pdf]
